# Supplementary material for: The tomato xylem sap protein XSP10 is required for full susceptibility to Fusarium wilt disease
Source: PubMed Central journal article supplement — J Exp Bot. 2010 Oct 25;62(3):963–73. doi: 10.1093/jxb/erq327 (PMC3022394; doi:10.1093/jxb/erq327), 2010-10-25
Supplement: supp_erq327_00051078-file001.pdf [file supp_erq327_00051078-file001.pdf]

**The tomato xylem sap protein XSP10 is required for full susceptibility to Fusarium wilt disease**

Vladimir Krasikov, Henk L. Dekker, Martijn Rep, Frank L.W. Takken

**Supplementary material**

**Figure S1. Nucleotide sequence of the XSP10 gene and its 5'- and 3'-flanking regions, and the deduced amino acid sequence of the XSP10. Secretion signal peptide is highlighted in bold. Intron sequence is underlined.**

tgaccatctgaggtattaactctcccttatttgggtgctctttttcaatctatgtataatt  
gatgttttttatcgtgtattaaagtgtttattgttaatatcaagaatttctaggtattat  
caatgcaatggttttaatgcatacattaaatgattaaaaactcaaatgtccctcaaaagc  
cttttatacatttttctgccatagtaatagaggatcttttgcaaatctttttttata  
caatacatgctatttttcttatgcatcaaatgaaacaattcattaaaacaagggaaactt  
tcacatatagtcacttaaaaaataattaattgctctctataactatagtttaataattaca  
atgtgtaactacatggtgtttggaggagagggcgagctagactgggagagagaggggga  
aaagagtggagaaagatgaattgtatatgtatatgtttagataaattgtatattataca  
tatgtaattgtgtatatgttcaagagagatggagagggaggagagggcgagcagcagatact  
ggcagggagagagagaggtgagtgagtgagatcgagagagacaagcgagagaggtgaattgta  
tatgtatataatgtataatatacatatataatgtataaatggcaagcgagattgggag  
agggagagagagggcgagcagagattgagagcgggaggagagaggctagcgagagagggca  
aaaagtgggagagggcgaattatataatgtatataggctaaaaattgtatattatacata  
tttattgtacatcctgacgaattatacatatacaaacatgattaattatacaaaactcga  
agtcagcccacgtaattaaaataatgttagtcgagattggtaattatagcaaaactata  
gctatgatgagtaaatataatagatattgcttatctgctgtaaaattttccttaaaaa  
atattgtataaaaaaatcaagcacaactgatacagtcatttaataattattcttataca  
ctatcaagtgtctgcatacaaaagatcttaaacacagattgggtcaaggatcaaggatg  
tatattgaactaaaattccattgcaaaatttgatgaacctgttctctattataacttaatt  
tactatatttccatagtttaattggagtaagcatttgagttgtattatattaattgaaatt  
atcttaagtgtcatgttttcccaatgtgaacacctcttaaaagcatctcaaatgatggca  
ataatgttgataaatgaattaatttgcttttgacaagacaccaacatcattataaatata  
aaaatagagatgcttttaattggctcatccactatagtattttgggaatttcacgtgtca  
acattatcttaacaacatgttcaatataaattttgacctgggaagggcaatacaaaaac  
aaaaattatttgcagga

ATG AAC TAC TTG TTG TGT GTT GTA GGA TTT GTT GTG CTA CTG GCC ATT GCT GGA GCT GAT GGA GCC GGT GAA  
**M N Y L L C V V G F V V L L A I A G A D G A G E**  
TGC GGG AGA AAT TCT CCA GAT ATG GAA GCC ATG AAA TTG ATT CCT TGC GCA AAA GCA GCA TCG GAT GAG AAT  
C G R N S P D M E A M K L I P C A K A A S D E N  
GCA TCC GTA TCA AGG AGT TGT TGT TTA CAA ATA CAG AAA TTG GGA CAC AAC CCG AAA TGT CTC TGT GCT GTT  
A S V S R S C C L Q I Q K L G H N P K C L C A V  
ATG CTC TCA AAT ACT GCT AAA AGC TCT GGA GCT AAT CCT GAA GTT GCG ATA ACC ATC CCC AAG CGT TGT AAC  
M L S N T A K S S G A N P E V A I T I P K R C N  
CTA GCC AAT CGT CCC GTT GGC TAT AAG TGT GGA C gtatgttcttaattcttaataaaaattatattatattttttcacatctccaat  
L A N R P V G Y K C G P

atatatatataactaattaatcttcatcttctcgtgttttaattgcag CT TAC ACA CTG CCA TGA  
Y T L P \*

agactacacgatatggttactatgtttatgtacatgtgtttgggtggcagatgtaataact  
gtgttcttctgttattgtggccttaatttataatcagatcgatcatgtcatgtatcatttc  
tgattagcataaataatattttgtgttttcttcttctcgcgatgaagatgattttcttatcc  
tttaattttcatcagtgatttgcctcaactcaatctttcggatttgactcattcttctgt  
ttgtttatgtggattaattgttgcgaagatctcatcttgaatcggctcgcacgcagggcg  
tctttagtccagacaccactaaagtcatcgttggagccctattctttttaaacaacaaaa  
gtacttgaattgttattttttaaacaacaaattatctactatgagtgctatgatttct  
actaagaaaattgcacacgagatggaaacaatttgatgaaaatagtgacaacgaaatcac  
aaagtccttgaattagatttcaaccagttgaagtatatgaaaatatcttttgtttctta  
tttagtggtaaatggatcactagataatgagatttttttaatttttgggaaaatgtac  
aagtaccocctaccctatgctcgaatctcatagactacttatattataactaaggatcta  
ttaccocctgaacttattatataaataattttctatcccttttcggcctaagtgcactat  
catgtgggctcagcgcattgtgacatttttttcaagttagtgctacgtaggcgaagg  
gctagaaaatttttataaaaataagatcaagggaaaataggtactttgtatagataagt  
ctgagatttccggacataggttggagggtacttatgcattttccaaaaaagaatattgt  
cttgaactttctttaaacaacataatatttctgatattgatgatttagattttttttg  
aattaaaagtgttaagaagtaatacaagtagaagataatgacctaaataaaactcaatc  
aaaccggattttttcaaatacacataattgcttataatataatataaacgttcatgta  
accgttacctcagctgaagaagtttttggaaactaaaattgtatttaagattgataatg  
tcccaagagagattgaatgaatttaattgtattatcaattgaaaaggaattatataaacga  
gttgattataaaaacaataactaatgacttcacattttaaaggggaaaatgcacaagaacc  
cccctagactatgaccgaaatcccaagagaaaccttaactatttcaaggtcttgttacc  
cccctaactatttcttttgttaattttatgcacctttttggcttacgtgacattcaata  
tttttccagcccctcgattgctgtggagtcacagattatgccacgtaagacaaaaggtgtg  
taaaatttacaacaaaaaaatcagaagggcaataagacgggggggtacttgtgccttttc  
cctttttaaactaaaaagtatatatatatatatatatatatatatatatatatatat  
gtatgtatgtatatatatatatatatatatatatatatatatatatatatatatatat

**A**

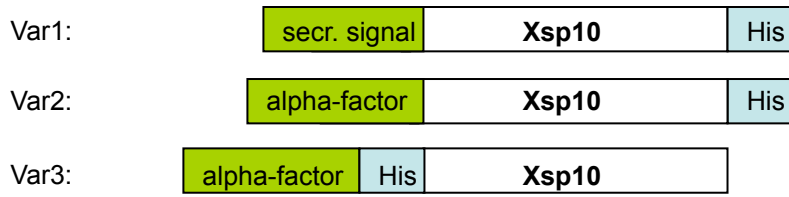

**B**

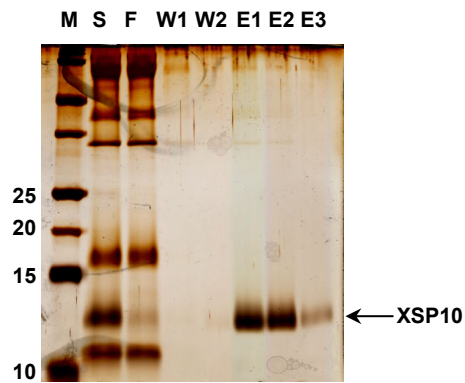

**Figure S2. Recombinant XSP10 affinity purification.** Recombinant variants of XSP10 used in this study. **(B)** SDS-PAGE showing affinity purification of the recombinant XSP10 (Var2). M – protein standards, S – sample (proteins precipitated from *P. pastoris* culture supernatant), F – flow through, W – wash, E – elution fractions 1-3.



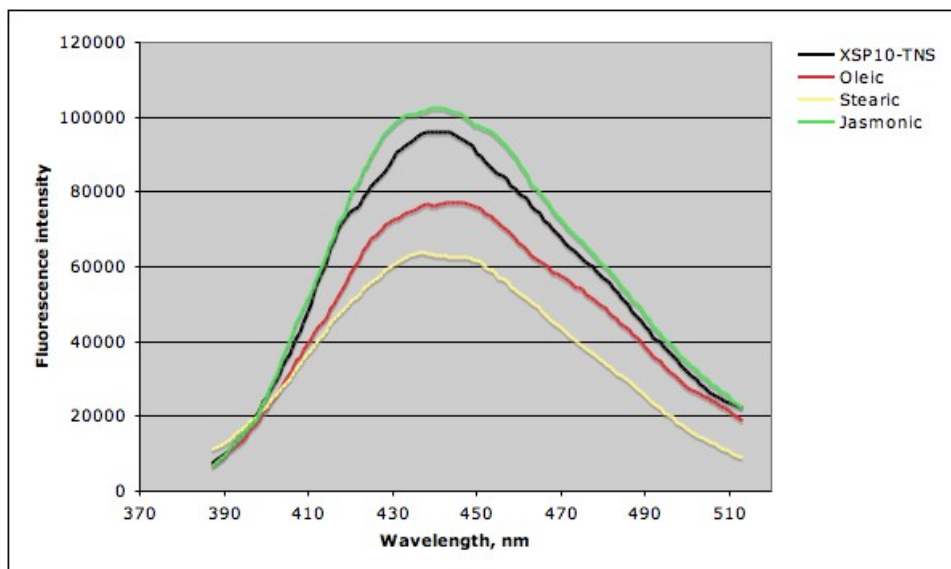

**Figure S4. Displacement of the TNS from XSP10 by stearic, oleic, and jasmonic acids.** Fluorescence emission spectra are shown for the XSP10 (100 nM) with TNS (5  $\mu$ M) and after addition of FAs or JA (10  $\mu$ M).

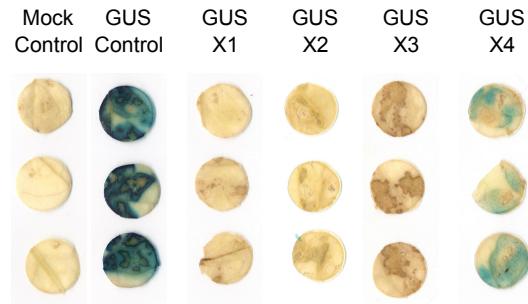

**Figure S5. Transient *GUS* expression is silenced in T1 progeny of hpXSP10 lines.** Young tomato leaves were infiltrated with *A. tumefaciens* strain C58C1 harboring plasmid pTFS40, resulting in transient *GUS* expression from the CaMV 35S promoter. Two days after infiltration leaf disks were punched and stained for *GUS* activity. *GUS* expression appeared absent or strongly reduced in hpXSP10 lines as compared to the GCR161 control. A partially silenced hpXSP10 line (X4) is shown for comparison.

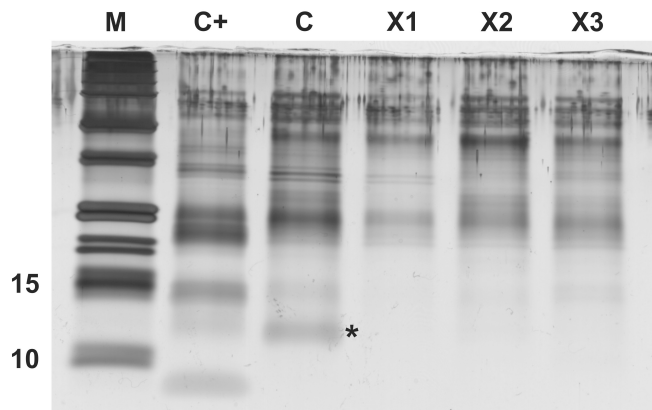

**Figure S6. XSP10 abundance is reduced in hpXSP plants.**

Xylem sap of 8 week-old mock-inoculated control (**C**), *hpXSP10* plants (X1, X2 and X3) and Fol007-infected control plants (C+) was concentrated 20-fold by acetone precipitation and loaded on 15% Tris-Tricine SDS-PAGE. Loading was normalised on the amount of protein.

M: protein standards, \* marks XSP10 protein.

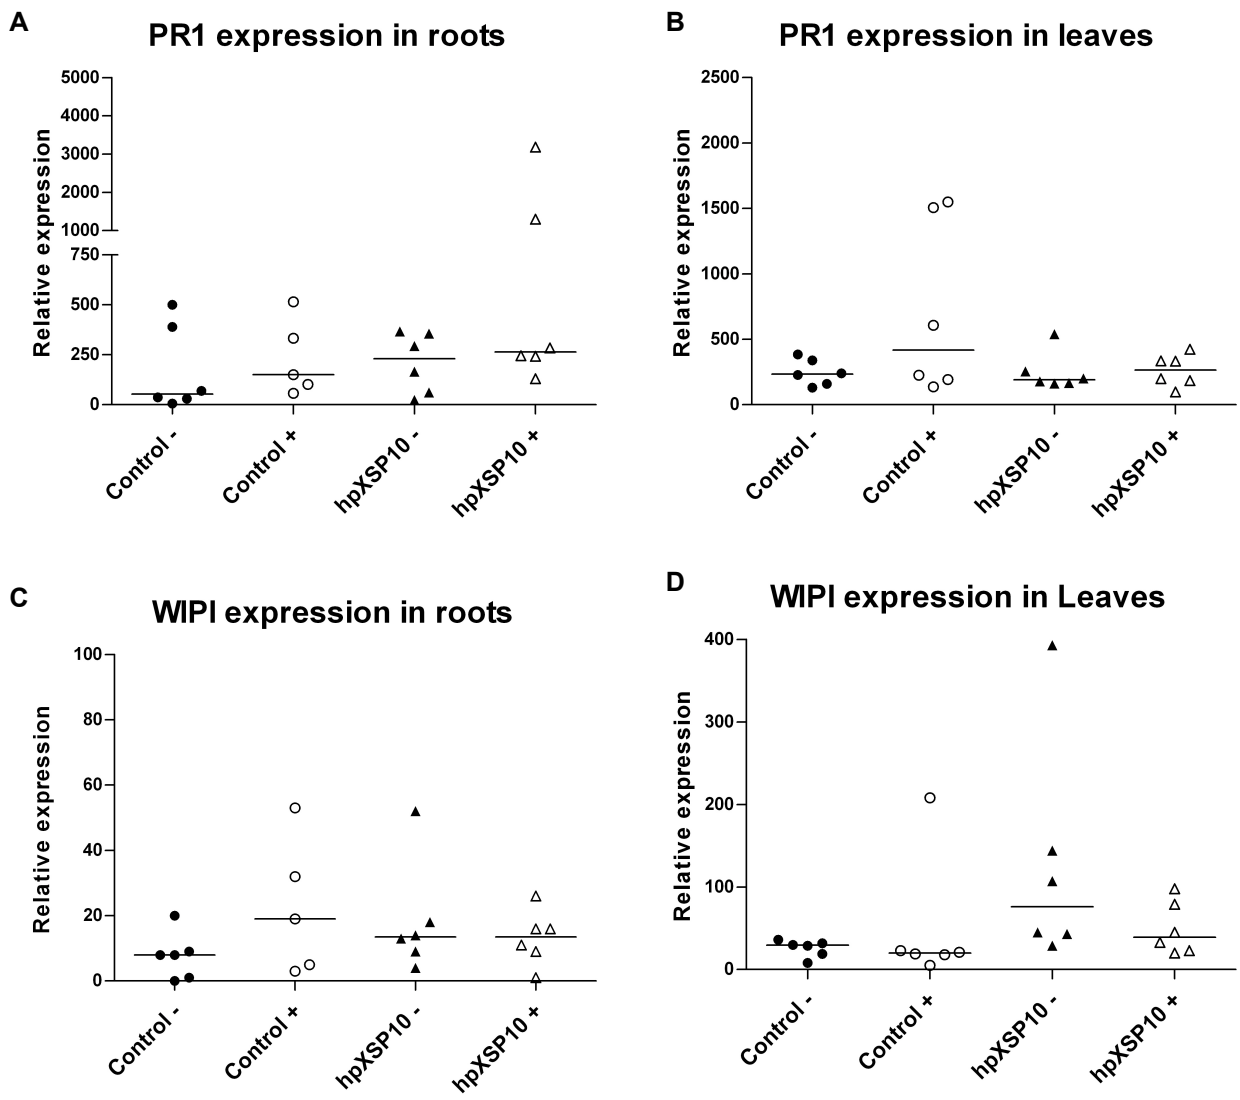

**Figure S7. PR1 and WIPI transcription levels are not significantly altered in roots and leaves of hpXSP plants upon Fol007-infection.**

Roots and leaves were collected three weeks after mock or Fol007-inoculation of ten-days-old seedlings. Transcript levels were determined by real-time qPCR relative to *alpha-tubulin* in roots and *RCE* in leaves of mock-inoculated (-) or Fol007 infected (+) control and hpXSP plants. Median and individual expression of 6 plants per condition are shown.
